# Supplementary material
Source: PubMed Central journal article supplement (PMC5786768)
Supplement: AAC.01441-17_zac002186855s1.pdf [file AAC.01441-17_zac002186855s1.pdf]

## SUPPLEMENTAL MATERIAL

**TABLE S1** Primers and probes used for real-time RT-PCR analysis.

| <b>Gene</b> | <b>5' primer</b>           | <b>Probe</b>                    | <b>3' primer</b>                |
|-------------|----------------------------|---------------------------------|---------------------------------|
| <i>Prnp</i> | 5'-TCTGTGTCCCCATAGGCTAA-3' | 5'-CCCCTGGCACTGATGGGCC-3'       | 5'-AAGCAAAGAGCAACTGGTCTACTGT-3' |
| <i>Gapd</i> | 5'-CTCCACTCACGGCAAATCA-3'  | 5'-AGGCCGAGAATGGGAAGCTTGTCAT-3' | 5'-CGCTCCTGGAAGATGGTGAT-3'      |

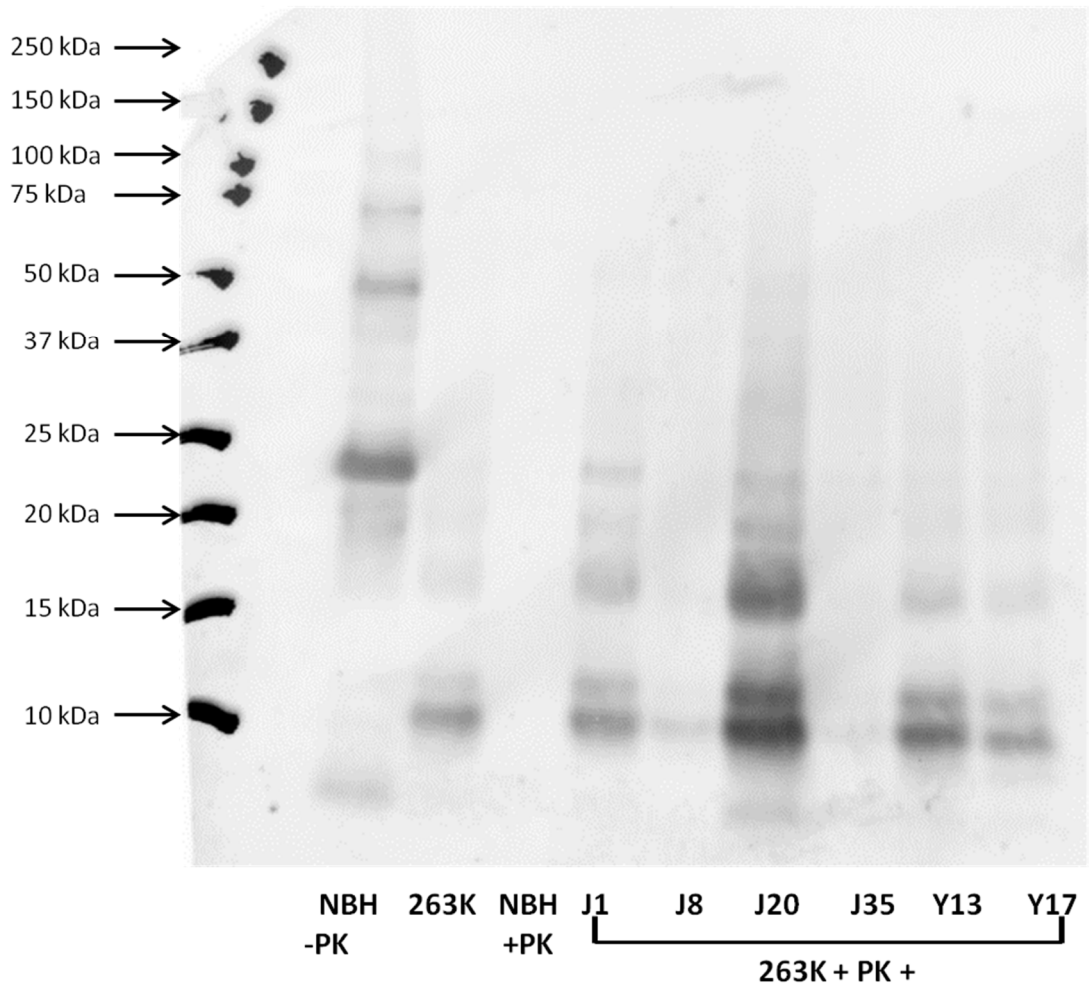

**FIG S1 Whole Western blot image from RT-QuIC with hamster 263K seed.**

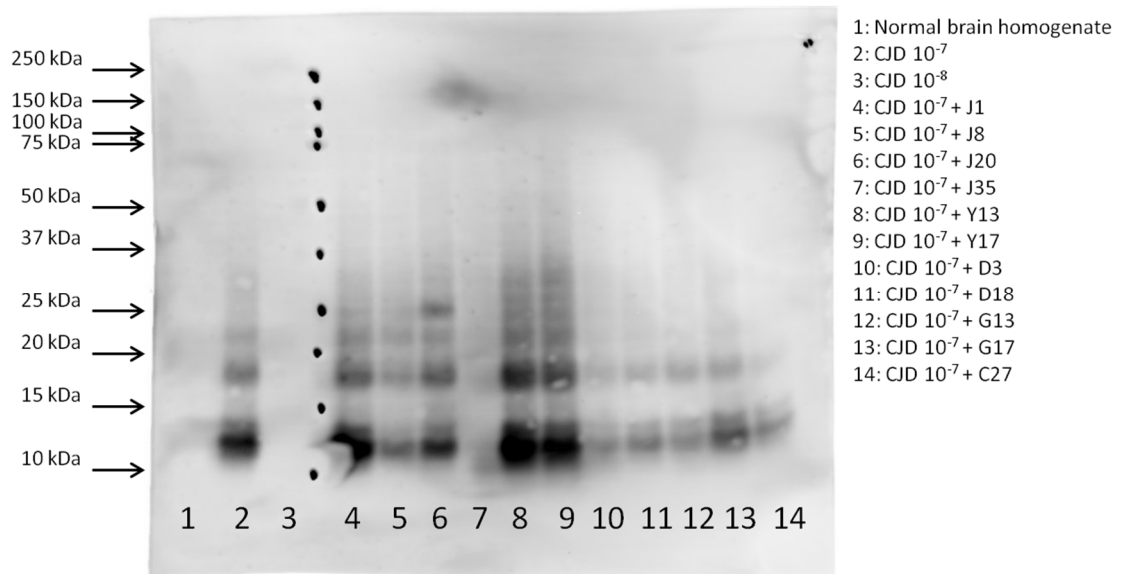

**FIG S2 Whole Western blot image from RT-QuIC with human CJD seed.**

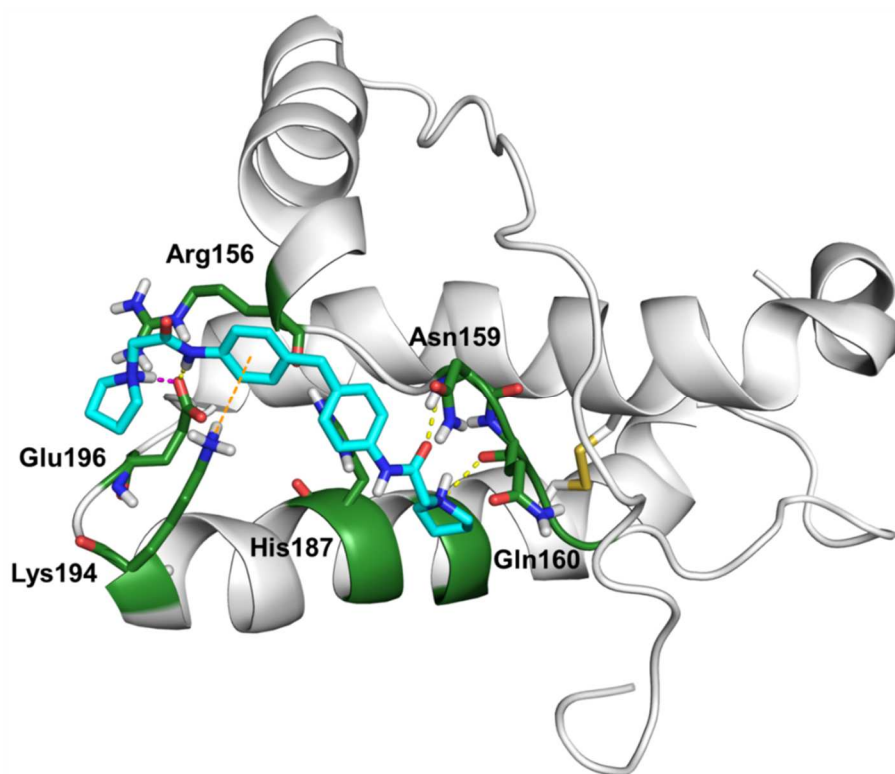

**FIG S3 Molecular docking simulation of GN8 with PrP<sup>121-231</sup> (PDB: 1AG2).** The carbon atoms in the main residues of PrP<sup>C</sup> hot spot regions are colored in green, and the carbon atoms in GN8 are colored in cyan. Yellow, magenta and orange dashed lines represent hydrogen bonds, ionic interactions and cation- $\pi$  interactions, respectively. Electrostatic interactions were formed between the amine portion of a GN8 amide group and Glu196 side chain (2.8 Å); a GN8 charged tertiary amine and Glu196 side chain (2.7 Å); a GN8 phenyl ring and Lys194 side chain (~ 4.0 Å); the carbonyl portion of the other GN8 amide group and Asn159 main chain (2.8 Å); and a GN8 charged tertiary amine and Gln160 main chain (2.8 Å). The binding energy was -8.83 kcal/mol.

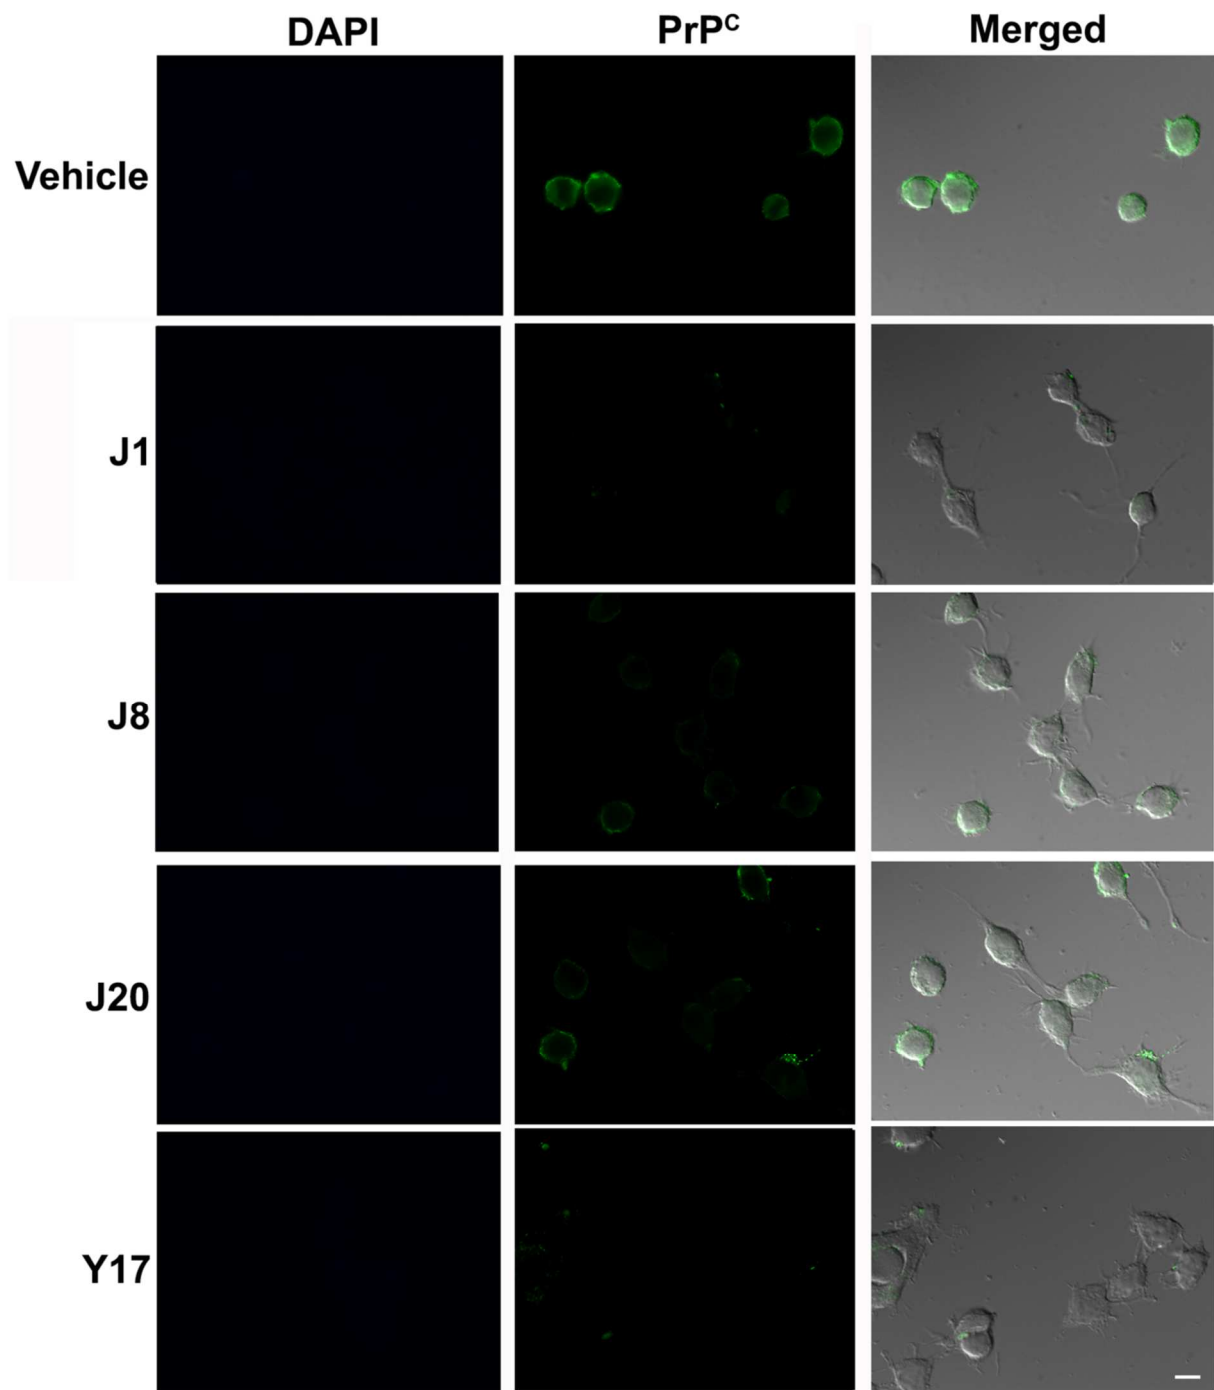

**FIG S4 PrP<sup>C</sup> neuronal exposition after test compounds treatment.** Representative fields of immunofluorescence analysis of PrP<sup>C</sup> (green), merged with differential interference contrast images. The nuclear staining with DAPI was used as a non-permeability control. Mouse neuroblastoma N2a cells were treated with 10  $\mu$ M of test compounds (J1, J8, J20, and Y17) or 0.1% DMSO (vehicle). Scale bar corresponds to 10  $\mu$ m.

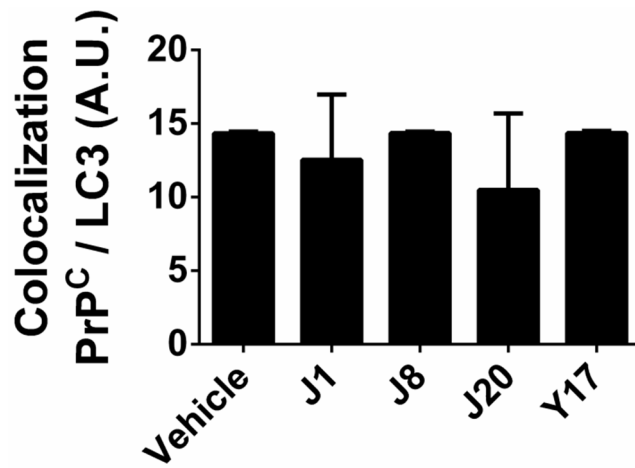

**FIG S5 PrP<sup>C</sup>/LC3 colocalization after test compounds treatment.** Colocalization analysis was performed with ImageJ software. 20 fields with more than 30 cells each were analyzed per condition. One-way analysis of variance (ANOVA) was performed. Error bars indicate SEM.

## Thermal denaturation followed by circular dichroism spectroscopy

This assay was executed as previously described (1, 2). Circular dichroism spectra were measured on a J-715 spectropolarimeter (Jasco Corporation, Tokyo, Japan) with 1.0-mm path-length cuvettes. Murine rPrP<sup>23-231</sup> was diluted to a final concentration of 10  $\mu$ M in 10 mM sodium phosphate buffer, pH 6.5, in the presence of the compounds at 10  $\mu$ M and 100  $\mu$ M. The vehicle for each condition corresponds to 0.1% DMSO and 1% acetonitrile, respectively. The samples were heated from 25 to 80 °C at a rate of 1 °C/min, and ellipticity values were collected at 222 nm with a bandwidth of 2 nm. Data is displayed as fraction denatured (FD), which was calculated by the following equation:

$$FD = \frac{\epsilon_{measured} - \epsilon_{initial}}{\epsilon_{final} - \epsilon_{initial}}$$

where  $\epsilon_{measured}$  is the ellipticity (222 nm) value measured at any point,  $\epsilon_{initial}$  is the ellipticity value collected at the initial temperature value considered, and  $\epsilon_{final}$  is the ellipticity value recorded at the final temperature value considered. FD plots were then fitted to four-parameter sigmoid regression curves described by the following equation.

$$y = y_0 + \frac{a}{1 + e^{-\left(\frac{x - x_0}{b}\right)}}$$

where  $y$  is fraction denatured,  $y_0$  is the minimum value of fraction denatured,  $x$  is temperature,  $x_0$  is the temperature required for 50% of maximum denaturation ( $T_{1/2}$ ),  $a$  is the difference between the maximum and minimum values of fraction denatured, and  $b$  is the curve slope.

1. Cordeiro Y, Kraineva J, Gomes MPB, Lopes MH, Martins VR, Lima LMTR, Foguel D, Winter R, Silva JL. 2005. The Amino-Terminal PrP Domain Is Crucial to Modulate Prion Misfolding and Aggregation. *Biophys J* 89:2667–2676.
2. Vieira TCRG, Cordeiro Y, Caughey B, Silva JL. 2014. Heparin binding confers prion stability and impairs its aggregation. *FASEB J* 28:2667–2676.

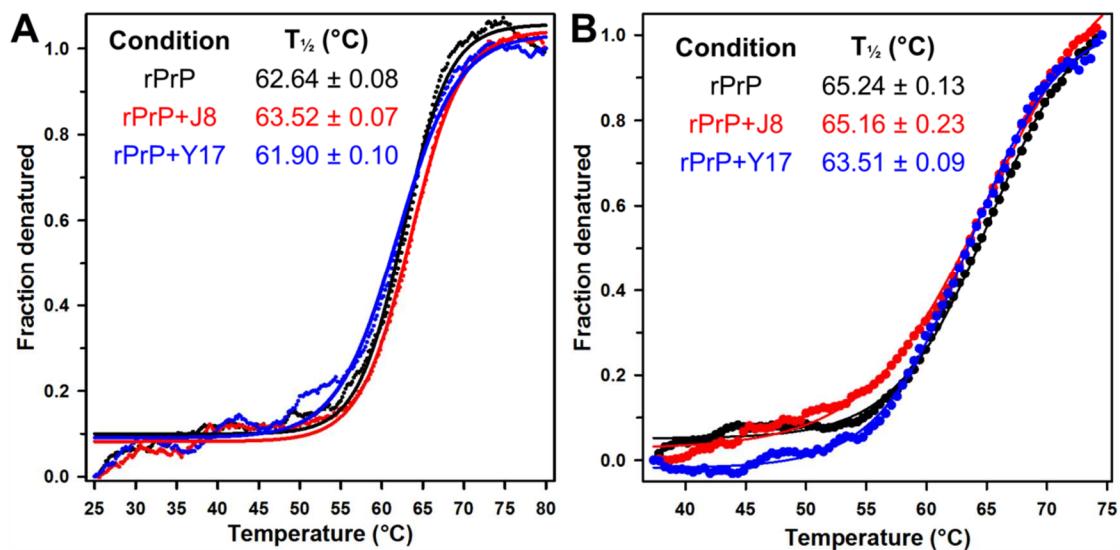

**FIG S6 Temperature-induced denaturation profile of rPrP<sup>23-231</sup>.** The protein was analyzed at 10  $\mu$ M in the presence of test compounds at (A) 10  $\mu$ M and (B) 100  $\mu$ M. The vehicle for each condition corresponds to 0.1% DMSO and 1% acetonitrile, respectively. The results are displayed as fraction denatured (FD). Inset shows  $T_{1/2}$  values calculated for the control (black), J8 treatment (red), and Y17 treatment (blue).
